# Supplementary material for: Inactivation of interleukin-30 in colon cancer stem cells via CRISPR/Cas9 genome editing inhibits their oncogenicity and improves host survival
Source: HighWire-hosted journal article supplement (doi:10.1136/jitc-2022-006056), 2023-03-01
Supplement: jitc-2022-006056supp003_data_supplement.pdf [file jitc-2022-006056supp003_data_supplement.pdf]

**Supplemental Table S1.** Antibodies used in flow cytometry

| Antibody          | Format       | Research Resource Identifiers (RRIDs) | Source                                      |
|-------------------|--------------|---------------------------------------|---------------------------------------------|
| <b>Anti-human</b> |              |                                       |                                             |
| ALDH1             |              | RRID:AB_2784960                       | Thermo Fisher Scientific, Waltham, MA, USA  |
| CD24              | PerCP-Vio700 | RRID:AB_2656568                       | Miltenyi Biotec, Bergisch Gladbach, Germany |
| CD26              | PE           | RRID:AB_2889525                       | “                                           |
| CD44              | APC          | RRID:AB_398683                        | BD Biosciences, Franklin Lakes, NJ, USA     |
| CD126             | PE           | RRID:AB_868803                        | “                                           |
| CD130             | FITC         | RRID:AB_868803                        | Abcam, Cambridge, UK                        |
| CD133             | PE           | RRID:AB_2726287                       | Miltenyi Biotec, Bergisch Gladbach, Germany |
| CD166             | APC          | RRID:AB_2751830                       | “                                           |
| CXCR3             | APC          | RRID:AB_398481                        | BD Biosciences, Franklin Lakes, NJ, USA     |
| CXCR4             |              | RRID:AB_2089399                       | R&D Systems, Minneapolis, MN, USA           |
| EGFR              | APC          | RRID:AB_2651599                       | Miltenyi Biotec, Bergisch Gladbach, Germany |
| EpCAM             | PerCP-Cy5.5  | RRID:AB_400263                        | BD Biosciences, Franklin Lakes, NJ, USA     |
| EPOR              | PE           | RRID:AB_2262227                       | R&D Systems, Minneapolis, MN, USA           |
| IGFR1             | APC          | RRID:AB_1907365                       | Thermo Fisher Scientific, Waltham, MA, USA  |
| IL30              | eFluor 660   | RRID:AB_11149127                      | “                                           |
| Ki67              | APC          | RRID:AB_2688057                       | “                                           |
| TIE2              | PE           | RRID:AB_2904809                       | Miltenyi Biotec, Bergisch Gladbach, Germany |
| VEGFR1            | APC          | RRID:AB_2784492                       | “                                           |
| VEGFR2            | PE           | RRID:AB_2733728                       | “                                           |

**Supplemental Table S2.** Antibodies used in immunostaining

| <b>Antibody</b>          | <b>Clone</b> | <b>Origin</b> | <b>Research Resource Identifiers (RRIDs)</b> | <b>Source</b>                               |
|--------------------------|--------------|---------------|----------------------------------------------|---------------------------------------------|
| <b><i>Anti-human</i></b> |              |               |                                              |                                             |
| CD14                     | 7            | Mouse         | RRID:AB_563494                               | Leica Biosystems, Newcastle upon Tyne, UK   |
| CD68                     | KP1          | Mouse         | RRID:AB_11151139                             | Thermo Fisher Scientific, Waltham, MA, USA  |
| CXCL5                    | 33160        | Mouse         | RRID:AB_2261181                              | R&D Systems, Minneapolis, MN, USA           |
| CXCR4                    | 44716        | Mouse         | RRID:AB_2089399                              | "                                           |
| EGF                      | Z-12         | Rabbit        | RRID:AB_631417                               | Santa Cruz Biotechnology, Dallas, TX, USA   |
| IGF1                     |              | Rabbit        | RRID:AB_308724                               | Abcam, Cambridge, UK                        |
| IL30                     |              | Rabbit        | RRID:AB_10898806                             | "                                           |
| JAK1                     | 6G4          | Rabbit        | RRID:AB_2265054                              | Cell Signaling Technology, Danvers, MA, USA |
| Ki67                     | MIB1         | Mouse         | RRID:AB_2142367                              | Agilent, Santa Clara, CA, USA               |
| LYVE1                    |              | Rabbit        | RRID:AB_535926                               | Novus Biologicals, Centennial, CO, USA      |
| RARB                     |              | Rabbit        | RRID:AB_11021140                             | "                                           |
| STAT3                    | 124H6        | Mouse         | RRID:AB_331757                               | Cell Signaling Technology, Danvers, MA, USA |
| TGFβ1                    | TB21         | Mouse         | RRID:AB_2539407                              | Thermo Fisher Scientific, Waltham, MA, USA  |
| TNFα                     | 1E8-G6       | Mouse         |                                              | Santa Cruz Biotechnology, Dallas, TX, USA   |
| VEGFA                    | VG-1         | Mouse         | RRID:AB_299738                               | Abcam, Cambridge, UK                        |
| <b><i>Anti-mouse</i></b> |              |               |                                              |                                             |
| CD31                     | SZ31         | Rat           | RRID:AB_2631039                              | Dianova, Hamburg, Germany                   |
| F4/80                    | Cl:A3-1      | Rat           | RRID:AB_323279                               | Bio-Rad, Hercules, CA, USA                  |
| IL30                     |              | Goat          | RRID: AB_355012                              | R&D Systems, Minneapolis, MN, USA           |
| Ly-6G                    | 1A8          | Rat           | RRID:AB_1089179                              | BioLegend, San Diego, CA, USA               |

**Supplemental Table S3.** Clinicopathological characteristics of CRC patients included in the “*Colorectal Adenocarcinoma TCGA Nature 2012*” collection and IL30 gene expression in their tumor samples

|                          | Number of patients | Percentages    | IL30 gene expression       |                           |
|--------------------------|--------------------|----------------|----------------------------|---------------------------|
|                          |                    |                | <i>IL30<sup>High</sup></i> | <i>IL30<sup>Mod</sup></i> |
| <b>Sex</b>               |                    |                |                            |                           |
| Female                   | 117                | 48.35%         | 6 (5.13%)                  | 111 (94.87%)              |
| Male                     | 125                | 51.65%         | 6 (4.80%)                  | 119 (95.20%)              |
| <i>Total</i>             | <i>242</i>         | <i>100.00%</i> | <i>12 (4.96%)</i>          | <i>230 (95.04%)</i>       |
| <b>Age</b>               |                    |                |                            |                           |
| ≤40                      | 3                  | 1.24%          | 0 (0.00%)                  | 3 (100.00%)               |
| 41-50                    | 18                 | 7.44%          | 1 (5.56%)                  | 17 (94.44%)               |
| 51-60                    | 26                 | 10.74%         | 1 (3.85%)                  | 25 (96.15%)               |
| 61-70                    | 70                 | 28.93%         | 4 (5.71%)                  | 66 (94.29%)               |
| 71-80                    | 69                 | 28.51%         | 3 (4.35%)                  | 66 (95.65%)               |
| ≥81                      | 38                 | 15.70%         | 2 (5.26%)                  | 36 (94.74%)               |
| UN*                      | 18                 | 7.44%          | 1 (5.56%)                  | 17 (94.44%)               |
| <i>Total</i>             | <i>242</i>         | <i>100.00%</i> | <i>12 (4.96%)</i>          | <i>230 (95.04%)</i>       |
| <b>Clinical Stage</b>    |                    |                |                            |                           |
| Stage I                  | 49                 | 20.25%         | 2 (4.08%)                  | 47 (95.92%)               |
| Stage II                 | 89                 | 36.78%         | 5 (5.62%)                  | 84 (94.38%)               |
| Stage III                | 61                 | 25.20%         | 3 (4.92%)                  | 58 (95.08%)               |
| Stage IV                 | 40                 | 16.53%         | 2 (5.00%)                  | 38 (95.00%)               |
| UN*                      | 3                  | 1.24%          | 0 (0.00%)                  | 3 (100.00%)               |
| <i>Total</i>             | <i>242</i>         | <i>100.00%</i> | <i>12 (4.96%)</i>          | <i>230 (95.04%)</i>       |
| <b>Molecular Subtype</b> |                    |                |                            |                           |
| CIN <sup>†</sup>         | 80                 | 33.06%         | 4 (5.00%)                  | 76 (95.00%)               |
| MSI <sup>‡</sup>         | 68                 | 28.10%         | 5 (7.35%)                  | 63 (92.65%)               |
| Invasive                 | 57                 | 23.55%         | 3 (5.26%)                  | 54 (94.74%)               |
| UN*                      | 37                 | 15.29%         | 0 (0.00%)                  | 37 (100.00%)              |
| <i>Total</i>             | <i>242</i>         | <i>100.00%</i> | <i>12 (4.96%)</i>          | <i>230 (95.04%)</i>       |

\*Unavailable data.

†Chromosomal instability.

‡Microsatellite instability.

**Supplemental Table S4.** Changes in gene expression profile of CRC cells and CR-CSCs after IL30 gene deletion by CRISPR/Cas9 editing

| Gene    | CRC*    | CR-CSC*              |
|---------|---------|----------------------|
| ZNF20   | -418.00 | -420.98 <sup>§</sup> |
| VEGFA   | -418.10 | -412.10              |
| COL24A1 | -172.81 | -163.81              |
| RAB33A  | -99.81  | -93.81               |
| COL5A3  | -64.52  | -74.52               |
| WNT5A   | -12.10  | -74.20               |
| LYVE1   | -60.19  | -67.19               |
| ADAM20  | -57.98  | -62.98               |
| ZNF541  | -55.02  | -55.02               |
| WNT8B   | -52.59  | -46.59               |
| ANGPT2  | -32.70  | -39.70               |
| NOS2    | -39.70  | -39.70               |
| COL9A1  | -34.93  | -36.63               |
| CXCL10  | -26.89  | -35.89               |
| MMP21   | -14.23  | -31.94               |
| ZNF429  | -18.25  | -28.25               |
| CCR7    | -33.77  | -27.77               |
| IL32    | -27.14  | -27.14               |
| IGF1    | -180.16 | -24.49               |
| ZNF157  | -14.30  | -24.30               |
| MMP2    | -15.00  | -24.30               |
| MUC8    | -18.98  | -23.98               |
| PROM2   | -33.53  | -23.53               |
| EGF     | -16.20  | -23.00               |
| ZNF781  | -10.65  | -20.65               |
| KLF18   | -18.46  | -20.46               |
| EPO     | -20.37  | -20.37               |
| CXCL11  | -30.37  | -20.37               |
| TNR     | -21.13  | -20.18               |
| CCR3    | -24.69  | -16.69               |
| OSM     | -11.69  | -16.69               |
| ZNF671  | -21.69  | -16.69               |
| ZNF300  | -9.69   | -16.69               |
| CCND2   | -24.37  | -16.37               |
| ZNF287  | -25.77  | -16.37               |
| ZNF578  | -9.37   | -16.37               |
| CXCR4   | -5.99   | -15.15               |
| MMP19   | -2.10   | -14.98               |
| WNT3A   | -4.60   | -13.72               |
| TNFSF10 | -13.18  | -13.18               |
| IL13    | -13.74  | -13.05               |
| ADAM33  | -11.74  | -13.05               |
| RAB3C   | -7.74   | -13.05               |
| ZNF521  | -4.74   | -13.05               |
| MMP13   | -5.20   | -13.00               |

| Gene     | CRC*   | CR-CSC* |
|----------|--------|---------|
| SERPINI2 | -9.35  | -12.55  |
| ZNF836   | -7.76  | -12.55  |
| MMP9     | -2.70  | -12.50  |
| ZNF608   | -2.49  | -11.49  |
| WNT2     | -5.80  | -10.80  |
| WNT4     | -2.20  | -9.73   |
| FGF12    | -5.81  | -8.81   |
| LTB      | -2.19  | -8.81   |
| SEMA6D   | -3.22  | -8.81   |
| WNT11    | -2.80  | -8.80   |
| ALK      | -8.72  | -8.72   |
| CCR1     | -3.75  | -8.72   |
| CCL20    | -17.72 | -8.72   |
| TNF      | -2.77  | -8.72   |
| VTN      | -15.72 | -8.72   |
| ADAM7    | -4.32  | -8.72   |
| MUC15    | -7.82  | -8.72   |
| CXCL17   | -14.24 | -8.72   |
| NRG1     | -17.72 | -8.72   |
| MUC6     | -3.28  | -8.72   |
| SERPINA5 | -9.08  | -8.72   |
| TRIB3    | -5.60  | -8.50   |
| CXCL5    | -2.57  | -7.27   |
| CXCR1    | -2.50  | -7.26   |
| IL37     | -15.03 | -7.03   |
| STAT3    | -2.37  | -6.72   |
| CXCR2    | -14.38 | -6.38   |
| JAK1     | -5.70  | -5.60   |
| TSPAN7   | -6.40  | -5.60   |
| TGFB2    | -14.50 | -5.50   |
| CCL25    | -4.87  | -5.13   |
| MYC      | -4.20  | -5.00   |
| AKT3     | -4.00  | -4.89   |
| CCR6     | -15.17 | -4.17   |
| CRIPTO 1 | -2.30  | -4.16   |
| APC2     | -11.99 | -4.01   |
| AKT1     | -2.90  | -3.60   |
| TRIB2    | -5.67  | -3.33   |
| SOCS1    | -11.06 | -3.06   |
| TGFB1    | -2.90  | -2.80   |
| TRIB1    | -12.30 | -2.80   |
| CCL2     | -18.00 | -2.80   |
| STAT1    | -3.40  | -2.80   |
| CCND1    | -5.60  | -2.80   |
| PCDHA10  | 5.67   | 4.33    |
| CLDN1    | 4.39   | 4.39    |
| VIM      | 4.00   | 4.56    |

---

| <b>Gene</b>   | <b>CRC*</b> | <b>CR-CSC*</b> |
|---------------|-------------|----------------|
| <b>NID1</b>   | 4.02        | 4.62           |
| <b>CIITA</b>  | 13.73       | 4.73           |
| <b>GBP1</b>   | 6.57        | 6.77           |
| <b>TTN</b>    | 4.38        | 7.38           |
| <b>PCDHA9</b> | 18.26       | 9.26           |
| <b>CD96</b>   | 12.35       | 9.35           |
| <b>CCL3</b>   | 8.37        | 13.37          |
| <b>SEMA3A</b> | 24.45       | 16.45          |
| <b>CD53</b>   | 27.49       | 17.49          |
| <b>RARB</b>   | 18.20       | 34.30          |
| <b>SOCS3</b>  | 153.20      | 174.50         |

---

\*Values are expressed as fold change variations with respect to the WT cells. Only genes with a fold change >2 in both cell lines are reported.

§Genes are reported starting from the most downregulated to the most upregulated in CR-CSC.
